# Supplementary material for: Interfacial charge-transfer in CoAl-LDH/CoO x for photocatalytic dye degradation and UV/H 2 O 2 assisted real-wastewater treatment
Source: Royal Society of Chemistry journal article supplement (doi:10.1039/d5tc03668b), 2025-12-18
Supplement: d5tc03668b1.pdf [file d5tc03668b1.pdf]

## **Interfacial Charge-Transfer in CoAl-LDH/CoO<sub>x</sub> for Photocatalytic Dye Degradation and UV/H<sub>2</sub>O<sub>2</sub> assisted Real-Wastewater Treatment**

Tariq Ali,<sup>a,b</sup> Yiwei Li,<sup>a,b</sup> Bingjie Fang,<sup>a,b</sup> Saleem Raza,<sup>\*c</sup> Yeyuan Xiao<sup>a,b \*</sup>

<sup>a</sup>Department of Civil Engineering and Smart Cities, Shantou University, Shantou, Guangdong 515063, China.

<sup>b</sup>Guangdong Engineering Technology Research Center of Offshore Environmental Pollution Control, Shantou University, Shantou, Guangdong 515063, China.

<sup>c</sup>College of Geography and Environmental Sciences, Zhejiang Normal University, Jinhua 321004, PR China.

<sup>\*</sup>Corresponding authors

Emails: [raza88@zjnu.edu.cn](mailto:raza88@zjnu.edu.cn) (SR) [yeyuanxiao@stu.edu.cn](mailto:yeyuanxiao@stu.edu.cn) (YX)

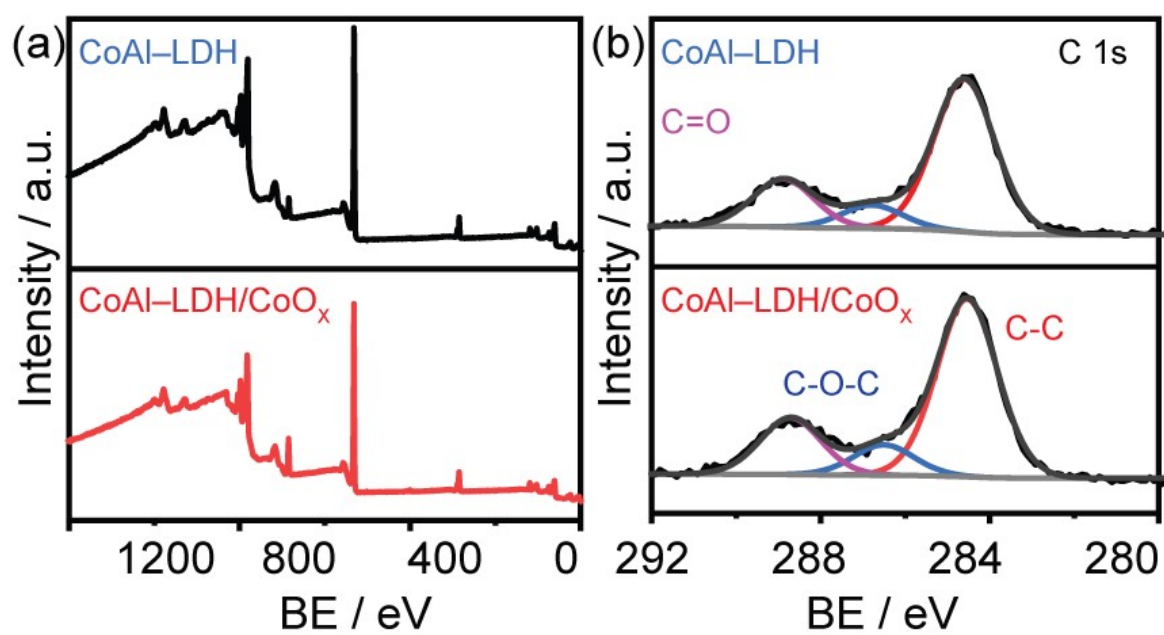

**Fig. S1.** Characterizations of the pristine CoAl-LDH and CoAl-LDH/CoO<sub>x</sub> (a) XPS survey spectra (b) C 1s spectra.

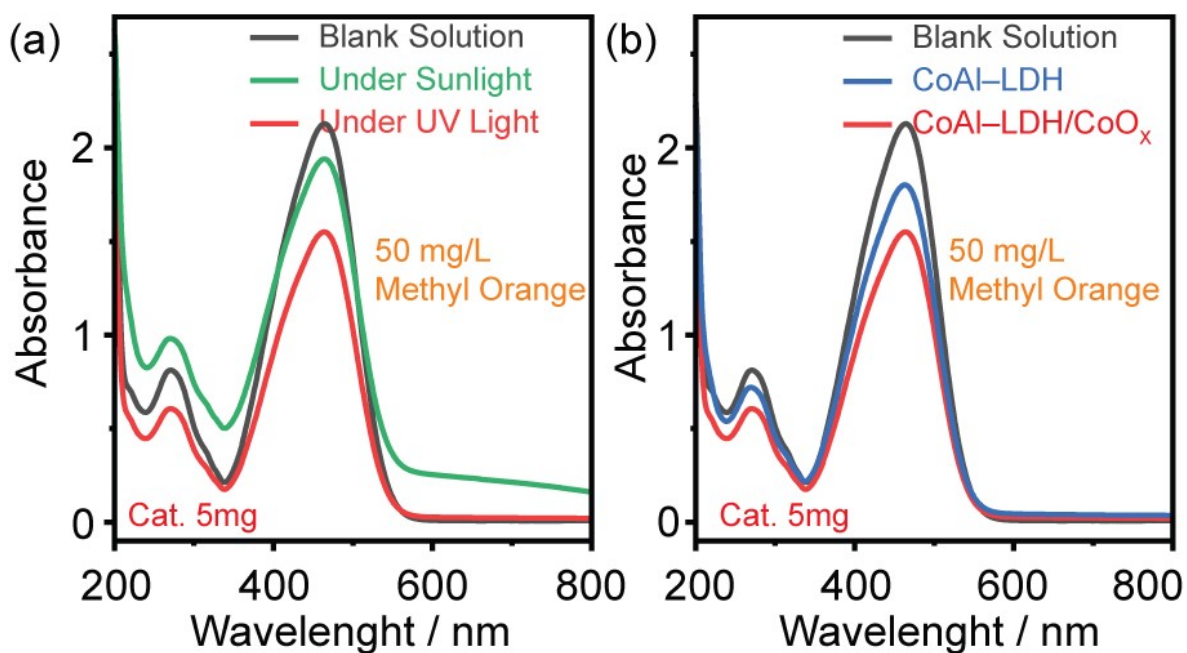

**Fig. S2. Photocatalytic Performance of CoAl-LDH/CoO<sub>x</sub> and CoAl-LDH.** (a) UV-vis spectra of methyl orange in the presence of CoAl-LDH/CoO<sub>x</sub> photocatalyst with an initial concentration of 50 mg/L during degradation with UV light and sunlight. (b) UV-vis spectra of methyl orange in the presence of CoAl-LDH/CoO<sub>x</sub> and CoAl-LDH with an initial concentration of 50 mg/L during degradation.

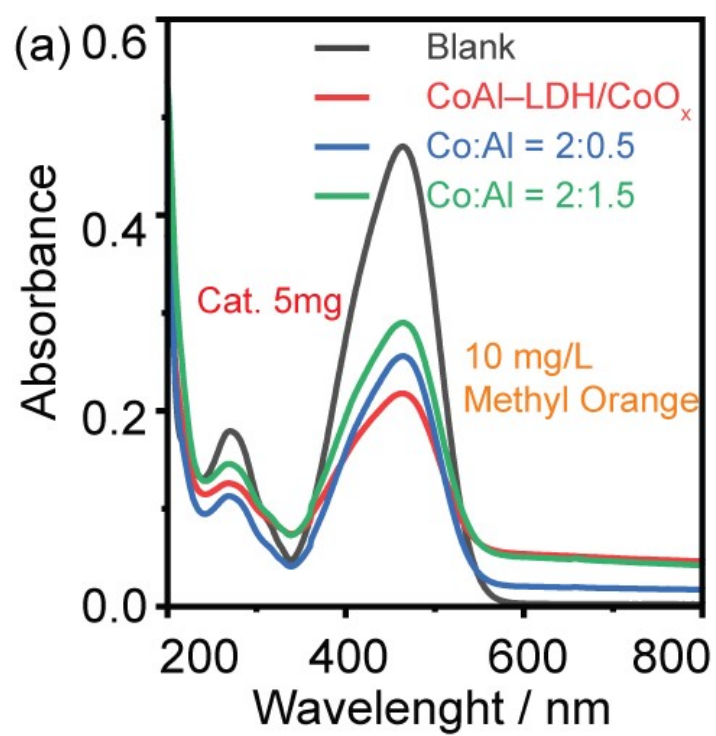

**Fig. S3. Photocatalytic Performance of CoAl-LDH/CoO<sub>x</sub>, Co:Al = 2:0.5 and Co:Al = 2:1.5.**

UV-vis spectra of methyl orange with an initial concentration of 10 mg/L during degradation.

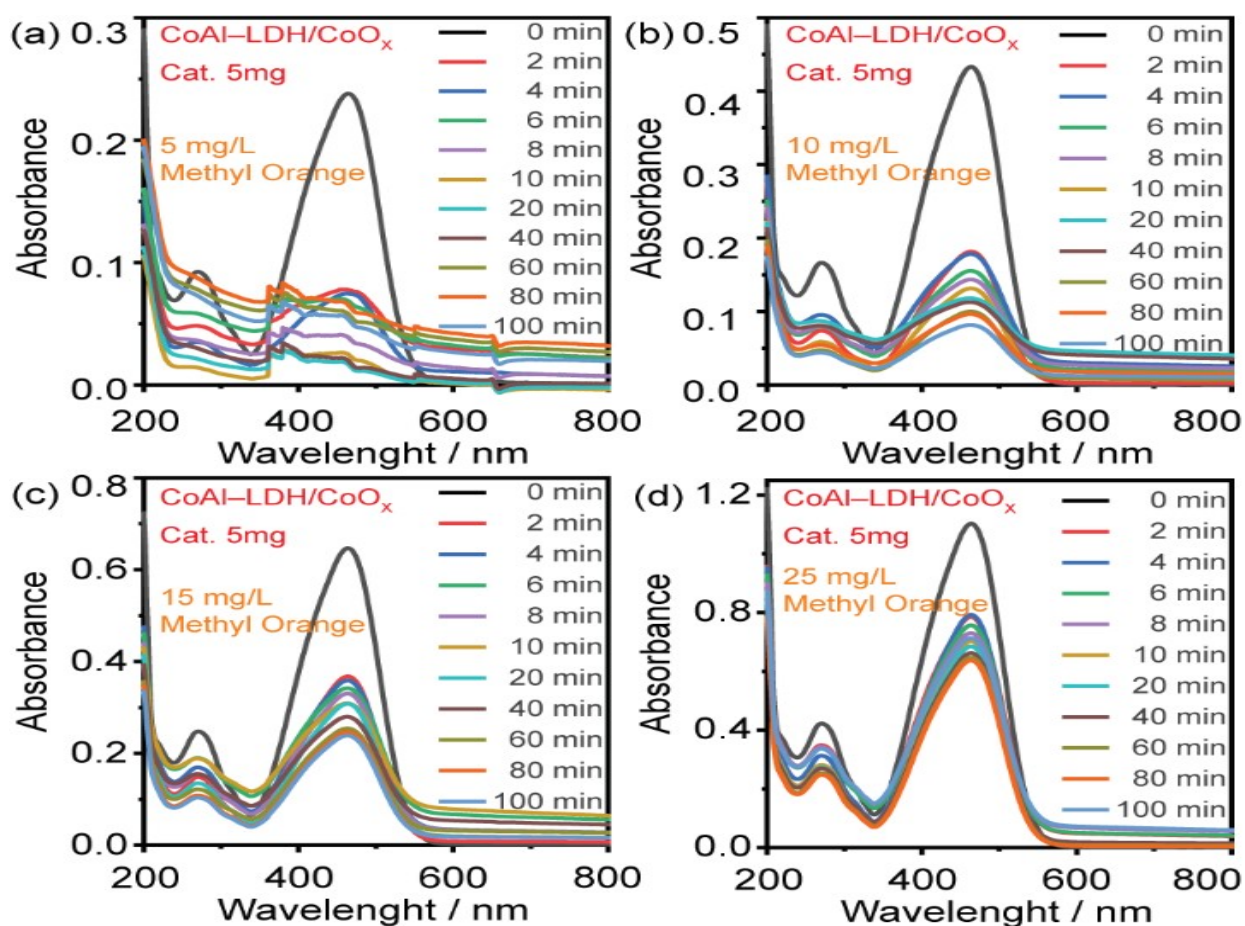

**Fig. S4. Photocatalytic Performance of CoAl-LDH/CoO<sub>x</sub>.** UV-vis spectra of methyl orange for a time duration of 100 min with an initial concentration of (a) 5 mg/L during degradation, (b) 10 mg/L during degradation. (c) 15 mg/L during degradation, (d) 25 mg/L during degradation.

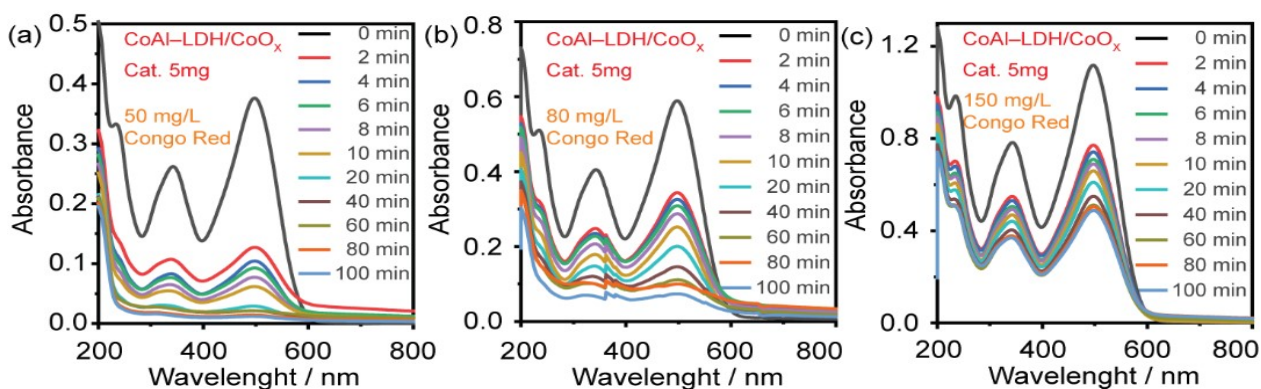

**Fig. S5. Photocatalytic Performance of CoAl-LDH/CoO<sub>x</sub>.** UV-vis spectra of Congo red for a time duration of 100 min with an initial concentration of (a) 50 mg/L during degradation, (b) 80 mg/L during degradation. (c) 150 mg/L during degradation.

In this work, the band positions used in the schematic alignment diagram (Fig. 12) were obtained by combining our experimental band-gap data with reported band-edge information from the literature. Specifically, the optical band gaps ( $E_g$ ) of CoAl-LDH and CoO<sub>x</sub> were estimated from UV-Vis diffuse reflectance spectra using Tauc plots based on the Kubelka-Munk function (Fig. 4b). Using these  $E_g$  values together with previously reported conduction- and valence-band edge positions (or electronegativity-based estimates) for CoAl-LDH and cobalt oxides, we constructed a qualitative band alignment that is consistent with the observed PL quenching and the  $h^+/\bullet O_2^-$ -dominated mechanism inferred from scavenger and EPR experiments. The diagram in Fig. 12 is therefore intended as a schematic illustration of the relative band positions and interfacial charge-transfer pathway, rather than an exact measurement of absolute band-edge energies.

The band positions in Fig. 12 were estimated theoretically by combining the experimentally determined band gap with the Mulliken electronegativity approach, which is widely used for semiconductor photocatalysts.[1–3]

First, the optical band gap ( $E_g$ ) of the CoAl-LDH/CoO<sub>x</sub> composite was obtained from UV-vis diffuse reflectance spectra using the Kubelka-Munk function and Tauc analysis. Plotting  $F(R) \cdot h\nu^{1/2}$  versus

$h\nu$  and extrapolating the linear region to  $F(R) \cdot h\nu^{1/2} = 0$  gave  $E_g \approx 3.77$  eV for CoAl-LDH/CoO<sub>x</sub> (Fig. 4b).

The valence-band ( $E_{VB}$ ) and conduction-band ( $E_{CB}$ ) edge potentials vs. the normal hydrogen electrode (NHE) were then estimated using the Mulliken electronegativity equations: [1–3]

$$E_{VB} = X - E_e + \frac{1}{2} E_g$$

$$E_{CB} = E_{VB} - E_g$$

where  $X$  is the absolute electronegativity of the semiconductor,  $E_e$  is the energy of free electrons on the hydrogen scale ( $E_e \approx 4.5$  eV), and  $E_g$  is the optical band gap. For CoAl-LDH-based materials, an absolute electronegativity of  $X \approx 5.85$  eV has been reported in recent g-C<sub>3</sub>N<sub>4</sub>/CoAl-LDH heterostructure studies.[4] Assuming that the CoAl-LDH/CoO<sub>x</sub> composite inherits the CoAl-LDH-dominated band centre with only modest shifts from CoO<sub>x</sub> nanoclusters, we used  $X = 5.85$  eV for the band-edge estimate. Substituting the experimental  $E_g$  and  $X$  gives:

$$E_{VB} = 5.85 - 4.50 + \frac{1}{2} \times 3.77 = 1.35 + 1.885 \approx 3.24 \text{ V vs. NHE}$$

$$E_{CB} = 3.24 - 3.77 \approx -0.53 \text{ V vs. NHE}$$

Thus, the CoAl-LDH/CoO<sub>x</sub> composite is estimated to have  $E_{CB} \approx -0.53$  V and  $E_{VB} \approx +3.24$  V vs. NHE. The conduction band is more negative than the O<sub>2</sub>/•O<sub>2</sub><sup>−</sup> redox couple ( $E^\circ(\text{O}_2/\bullet\text{O}_2^-) \approx -0.33$  V vs. NHE), while the valence band is more positive than the OH/•OH and H<sub>2</sub>O/•OH redox potentials ( $\approx +1.99 - 2.7$  V vs. NHE).[5,6] These positions support the mechanism proposed in Fig. 12: photogenerated electrons in the CB can reduce dissolved O<sub>2</sub> to •O<sub>2</sub><sup>−</sup>, and photogenerated holes in the VB can directly oxidize dyes and/or surface −OH groups (with •OH becoming more important in the presence of H<sub>2</sub>O<sub>2</sub>).

1. Di Paola, Agatino, et al. "A survey of photocatalytic materials for environmental remediation." *Journal of hazardous materials* 211 (2012): 3-29.
2. Rasheed-Adeleke, Azeezat A., et al. "Enhanced photocatalytic degradation of tetracycline using Ag<sub>3</sub>PO<sub>4</sub>/ZnFe<sub>2</sub>O<sub>4</sub> composite." *Applied Physics A* 131.11 (2025): 1-11.

3. Chen, Xiaobo, et al. "Semiconductor-based photocatalytic hydrogen generation." *Chemical reviews* 110.11 (2010): 6503-6570.
4. Jo, Wan-Kuen, and Surendar Tonda. "Novel CoAl-LDH/g-C<sub>3</sub>N<sub>4</sub>/rGO ternary heterojunction with notable 2D/2D/2D configuration for highly efficient visible-light-induced photocatalytic elimination of dye and antibiotic pollutants." *Journal of hazardous materials* 368 (2019): 778-787.
5. Wang, Kai, et al. "Hexagonal CdS single crystals coupled with layered CoAl LDH—a step-scheme heterojunction for efficient photocatalytic hydrogen evolution." *Journal of Sol-Gel Science and Technology* 107.1 (2023): 70-82.
6. Hoffmann, Michael R., et al. "Environmental applications of semiconductor photocatalysis." *Chemical reviews* 95.1 (1995): 69-96.



Table S1. Fluorescence region integrals (B, T: protein-like; A, M, C: humic-like) and EEM-derived indices (BIX, FI, HIX) for the raw textile wastewater and treated samples under UV or sunlight with/without CoAl-LDH/CoO<sub>x</sub> and different H<sub>2</sub>O<sub>2</sub> doses, corresponding to the conditions shown in Fig. 11.

| Entry | Sample                                                                                              | B        | T        | A        | M        | C        | BIX      | FI       | HIX      |
|-------|-----------------------------------------------------------------------------------------------------|----------|----------|----------|----------|----------|----------|----------|----------|
| 1     | RWW                                                                                                 | 2.792517 | 5.53963  | 4.01545  | 2.020157 | 0.502247 | 1.854736 | 2.548598 | 0.163404 |
| 2     | RWW-CoAl-LDH/CoO <sub>x</sub><br>photocatalyst-8.16 mM H <sub>2</sub> O <sub>2</sub>                | 0.826828 | 1.830609 | 0.52138  | 0.424152 | 0.145631 | 1.172786 | 1.507494 | 0.268705 |
| 3     | RWW-CoAl-LDH/CoO <sub>x</sub><br>photocatalyst-16.32 mM<br>H <sub>2</sub> O <sub>2</sub> -UV light  | 0.31732  | 0.930005 | 0.443913 | 0.418084 | 0.120315 | 1.040149 | 1.581192 | 0.416177 |
| 4     | RWW- CoAl-LDH/CoO <sub>x</sub><br>photocatalyst-8.16 mM<br>H <sub>2</sub> O <sub>2</sub> -Sunlight  | 4.678554 | 8.325116 | 1.275733 | 0.635039 | 0.174625 | 1.824623 | 1.871997 | 0.113486 |
| 5     | RWW- CoAl-LDH/CoO <sub>x</sub><br>photocatalyst-16.32 mM<br>H <sub>2</sub> O <sub>2</sub> -Sunlight | 4.35808  | 7.783861 | 1.209332 | 0.60551  | 0.159034 | 1.850145 | 1.921704 | 0.116913 |
| 6     | RWW- CoAl-LDH/CoO <sub>x</sub><br>photocatalyst-24.48 mM<br>H <sub>2</sub> O <sub>2</sub> -Sunlight | 4.6156   | 8.207937 | 1.255646 | 0.702668 | 0.205683 | 1.474142 | 2.130601 | 0.129949 |
| 7     | RWW- no catalyst-8.16 mM<br>H <sub>2</sub> O <sub>2</sub> - UV light                                | 4.651966 | 8.799412 | 1.563659 | 0.836587 | 0.26993  | 1.572561 | 2.055127 | 0.126675 |
| 8     | RWW- no catalyst -16.32<br>mM H <sub>2</sub> O <sub>2</sub> - UV light                              | 4.38653  | 8.163297 | 1.493351 | 0.843729 | 0.353819 | 1.393227 | 2.152558 | 0.15301  |
| 9     | RWW- no catalyst -24.48<br>mM H <sub>2</sub> O <sub>2</sub> - UV light                              | 4.347157 | 8.280476 | 1.529621 | 0.860469 | 0.366017 | 1.429165 | 2.298544 | 0.140768 |
